# Supplementary material for: Mumps in Vaccinated Children and Adolescents: 2007–2019
Source: Oxford University Press journal article supplement (doi:10.1542/peds.2021-051873), 2021-11-24
Supplement: peds_2021051873supplementarydata.pdf [file peds_2021051873supplementarydata.pdf]

## Supplemental Materials

### Characteristics of Adult Mumps Cases, 2007–2019

During 2007–2019, US health departments reported 28 306 mumps cases, of which 19 054 (67%) were adult cases (median age = 26 years; range: 18–101). All 50 states and the District of Columbia reported mumps cases, with a median of 162 adult cases (range: 1–2775) per state.

The median number of adult mumps cases reported each year was 1005

(range: 127–4339) (Supplemental Figure 6).

Median annual adult incidence was 4.1 per 1 000 000 population (range: 0.5–17.2) (Supplemental Figure 7).

Among adult mumps patients who had information on whether they were vaccinated (50% of patients), 74% had  $\geq 1$  MMR dose (median = 72% of patients, range: 53%–96% per year) (Supplemental Figure 8).

Among adult cases with information available on whether they were associated with a known outbreak (83% of cases), 66% were outbreak-associated. Adult cases were mostly outbreak-associated (median outbreak-associated = 54%, range: 2%–82% per year), and most cases were outbreak-associated each year starting in 2013 (Supplemental Figure 9).

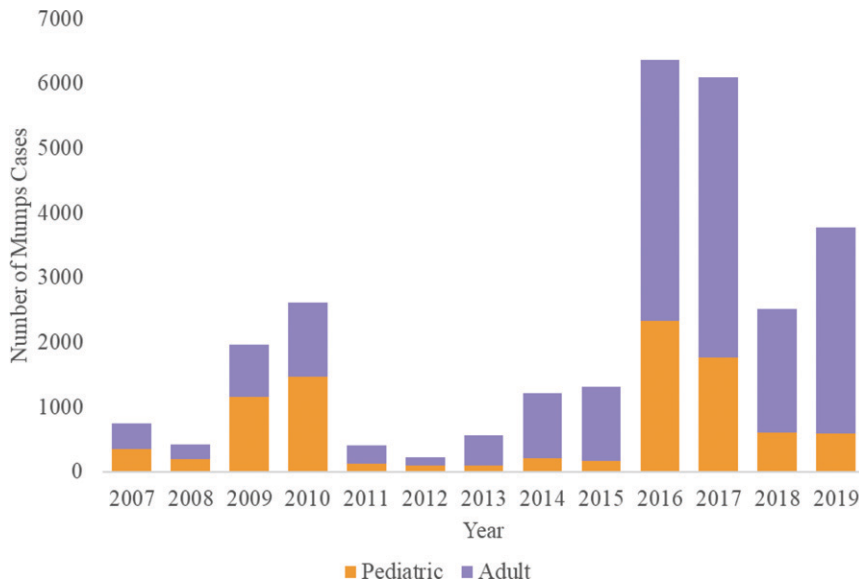

#### SUPPLEMENTAL FIGURE 6

Number of reported pediatric and adult mumps cases: United States, 2007–2019 ( $N = 28\,226$ ); 80 (<1%) cases did not have information on patient age.

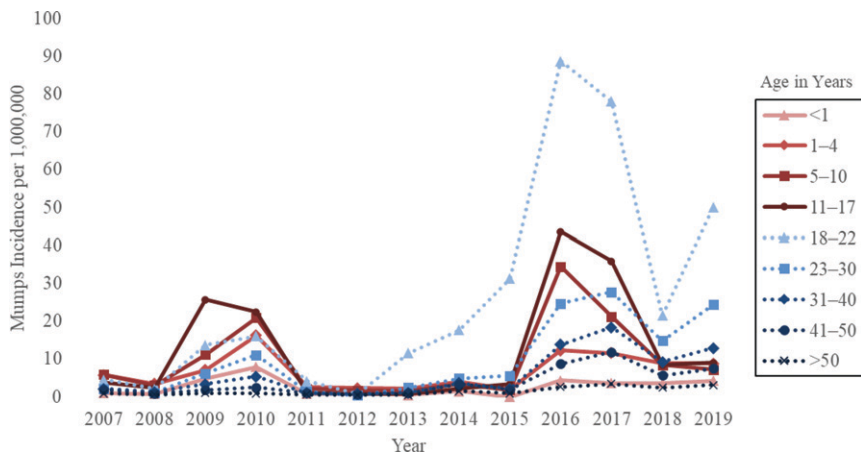

**SUPPLEMENTAL FIGURE 7**  
Incidence of reported mumps patients by age group: United States, 2007–2019.

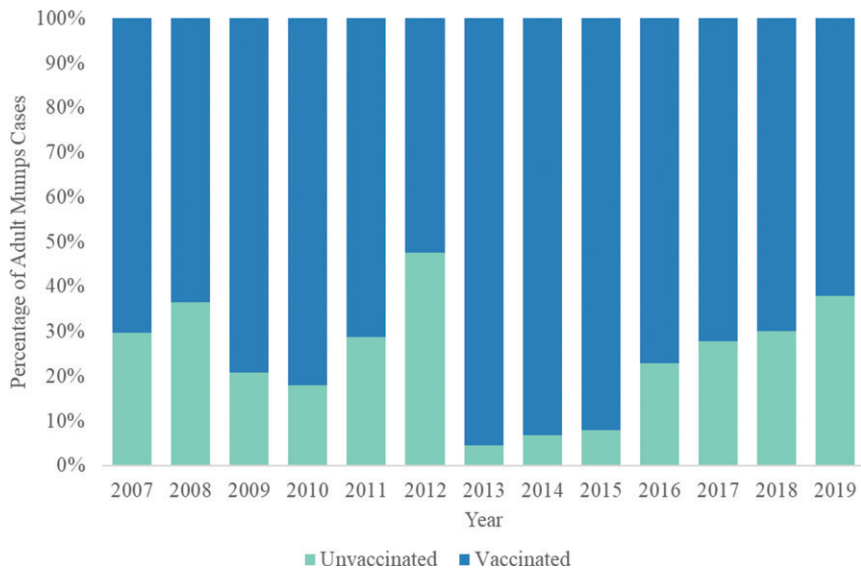

**SUPPLEMENTAL FIGURE 8**  
Adult mumps cases by vaccination status: United States, 2007–2019 ( $N = 9545$ ); 9509 (50%) adult cases did not have information on vaccination status.

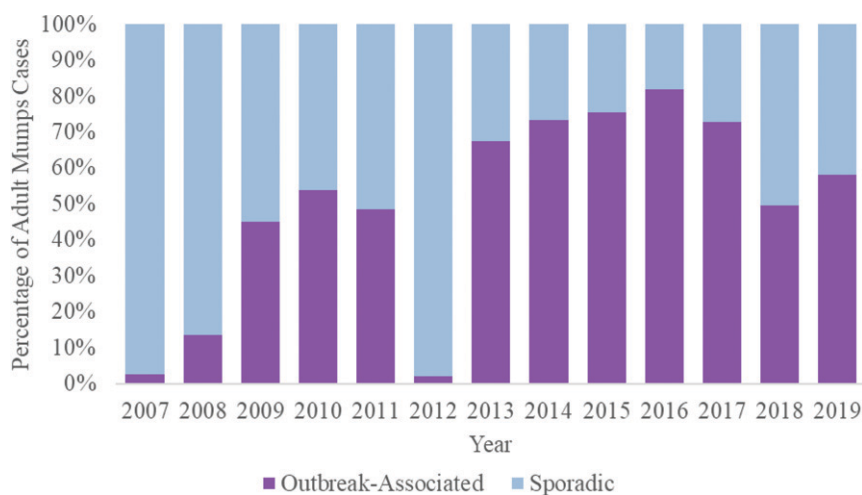

**SUPPLEMENTAL FIGURE 9**

Adult mumps cases by reported association with an outbreak: United States, 2007–2019 (*N* = 15 725); 3329 (17%) adult patients did not have information on outbreak association.

**SUPPLEMENTAL TABLE 3** Case Classification of Confirmed and Probable Mumps Cases According to CSTE Case Definitions

| Year               | Confirmed                                                                                                                                                                                                                                                                                                   | Probable                                                                                                                                                                                                                                                                                                                                                                             |
|--------------------|-------------------------------------------------------------------------------------------------------------------------------------------------------------------------------------------------------------------------------------------------------------------------------------------------------------|--------------------------------------------------------------------------------------------------------------------------------------------------------------------------------------------------------------------------------------------------------------------------------------------------------------------------------------------------------------------------------------|
| 2008 <sup>13</sup> | A case that (1) meets the clinical case definition <sup>a</sup> or has clinically compatible illness <sup>b</sup> and (2) is either laboratory confirmed or is epidemiologically linked to a confirmed case                                                                                                 | A case that meets the clinical case definition <sup>a</sup> without laboratory confirmation and is epidemiologically linked to a clinically compatible case                                                                                                                                                                                                                          |
| 2010 <sup>14</sup> | A case that (1) meets the clinical case definition <sup>a</sup> or has clinically compatible illness <sup>b</sup> and (2) is either laboratory confirmed or is epidemiologically linked to a confirmed case                                                                                                 | A case that meets the clinical case definition <sup>a</sup> without laboratory confirmation and is epidemiologically linked to a clinically compatible case                                                                                                                                                                                                                          |
| 2012 <sup>15</sup> | A positive mumps laboratory confirmation for mumps virus with RT-PCR or culture in a patient with an acute illness characterized by acute parotitis or other salivary gland swelling, lasting at least 2 d, aseptic meningitis, encephalitis, hearing loss, orchitis, oophoritis, mastitis, or pancreatitis | Acute parotitis or other salivary gland swelling lasting at least 2 d, or orchitis or oophoritis unexplained by another more likely diagnosis in a person with a positive test for serum anti-mumps IgM antibody or a person with epidemiological linkage to another probable or confirmed case or linkage to a group-community defined by public health during an outbreak of mumps |

<sup>a</sup> Clinical case definition: an illness with acute onset of unilateral or bilateral tender, self-limited swelling of the parotid and/or other salivary gland(s), lasting at least 2 d, and without other apparent cause.

<sup>b</sup> Clinically compatible illness: infection with mumps virus may present as aseptic meningitis, encephalitis, hearing loss, orchitis, oophoritis, parotitis or other salivary gland swelling, mastitis, or pancreatitis.
